# Supplementary material
Source: PubMed Central journal article supplement (PMC3541684)
Supplement: NIHMS326928-supplement-8.pdf [file NIHMS326928-supplement-8.pdf]

**Supplementary Table S1. Contributions of *mir-34a*<sup>-/-</sup> iPSCs to chimeric animals**

| <b>iPS cell line</b>                       | <b># of injected blastocysts</b> | <b># of live pups</b> | <b>No. of live Chimeras</b> | <b>Genetic background for blastocysts</b> | <b>Percentage of Chimerism</b>                                                                 |
|--------------------------------------------|----------------------------------|-----------------------|-----------------------------|-------------------------------------------|------------------------------------------------------------------------------------------------|
| <i>mir-34a</i> <sup>-/-</sup> iPSC line #1 | 20                               | 9                     | 3 (33%)                     | C57BL/6J                                  | 50% (2/3)<br>60% (1/3)                                                                         |
| <i>mir-34a</i> <sup>-/-</sup> iPSC line #2 | 34                               | 10                    | 2 (20%)                     | C57BL/6-cBrd/cBrd/Cr and<br>C57BL/6J      | 40% (1/2)<br>35% (1/2)                                                                         |
| <i>mir-34a</i> <sup>-/-</sup> iPSC line #3 | 92                               | 45                    | 17 (38%)                    | C57BL/6-cBrd/cBrd/Cr                      | 10% (2/17)<br>20% (2/17)<br>30% (2/17)<br>40% (1/17)<br>50% (6/17)<br>60% (1/17)<br>70% (3/17) |

c
